# Supplementary material for: Differential Tus– Ter binding and lock formation: implications for DNA replication termination in Escherichia coli
Source: Royal Society of Chemistry journal article supplement (doi:10.1039/c2mb25281c), 2012-07-24
Supplement: c2mb25281c_2.pdf [file c2mb25281c_2.pdf]

## SUPPLEMENTAL INFORMATION

### **Differential Tus-*Ter* binding and lock formation: Implications for DNA replication termination in *Escherichia coli***

**Morgane J.J. Moreau and Patrick M. Schaeffer\***

*Comparative Genomics Centre, School of Pharmacy and Molecular Sciences, James Cook  
University, DB 21, James Cook Drive, Townsville, QLD 4811, Australia.*

**\*Fax: +61 (0) 7 4781 6078; Tel: +61 (0) 7 4781 4448; E-mail:**

**[patrick.schaeffer@jcu.edu.au](mailto:patrick.schaeffer@jcu.edu.au)**

## SUPPLEMENTAL DATA

**Table S1: Related to Figure 3. Kinetic parameters of Tus affinity for *Ter* sites and their *Ter*-lock variants at 250 and 150 mM KCl.**

|                  | $10^{-5} k_a \pm \text{SEM}$<br>( $\text{M}^{-1} \text{s}^{-1}$ ) | $10^3 k_d \pm \text{SEM}$<br>( $\text{s}^{-1}$ ) | $K_D$<br>(nM) | $t_{1/2}$<br>(s) |
|------------------|-------------------------------------------------------------------|--------------------------------------------------|---------------|------------------|
| <i>TerA</i>      | 2.05 ± 0.17                                                       | 2.2 ± 0.07                                       | 10.7          | 315.8            |
| <i>Ter-lockA</i> | 1.56 ± 0.29                                                       | 0.21 ± 0.05                                      | 1.34          | 3309.9           |
| <i>TerB</i>      | 1.57 ± 0.12                                                       | 1.83 ± 0.08                                      | 11.6          | 379.8            |
| <i>Ter-lockB</i> | 1.52 ± 0.20                                                       | 0.16 ± 0.01                                      | 1.05          | 4366.9           |
| <i>TerC</i>      | 1.58 ± 0.12                                                       | 2.86 ± 0.17                                      | 18            | 242.6            |
| <i>Ter-lockC</i> | 1.64 ± 0.16                                                       | 0.20 ± 0.01                                      | 1.24          | 3408.9           |
| <i>TerD</i>      | 1.88 ± 0.16                                                       | 3.2 ± 0.15                                       | 17            | 217.4            |
| <i>Ter-lockD</i> | 1.34 ± 0.17                                                       | 0.27 ± 0.016                                     | 1.99          | 2588.8           |
| <i>TerE</i>      | 1.97 ± 0.1                                                        | 5.1 ± 0.15                                       | 25.6          | 137.0            |
| <i>Ter-lockE</i> | 1.13 ± 0.07                                                       | 0.23 ± 0.005                                     | 2.05          | 2979.3           |
| <i>TerF</i>      | 2.47 ± 0.38                                                       | 21.8 ± 2.20                                      | 88.4          | 31.8             |
| <i>Ter-lockF</i> | NA                                                                | 35.7 ± 4.25                                      | NA            | 19.4             |
| <i>TerG</i>      | 2.63 ± 0.31                                                       | 4.4 ± 0.1                                        | 16.7          | 157.4            |
| <i>Ter-lockG</i> | 0.94 ± 0.06                                                       | 0.3 ± 0.02                                       | 3.25          | 2276.5           |
| <i>TerH</i>      | NA                                                                | 22 ± 1.2                                         | NA            | 31.6             |
|                  | 4.10 ± 0.44                                                       | 0.56 ± 0.04                                      | 1.36          | 1244.2           |
| <i>Ter-lockH</i> | NA                                                                | NA                                               | NA            | 59.1*            |
|                  | 5.04 ± 0.35                                                       | 1.68 ± 0.09                                      | 3.34          | 411.7            |
| <i>TerI</i>      | NA                                                                | 24.1 ± 0.4                                       | 31            | 28.7             |
|                  | 5.54 ± 1.01                                                       | 0.73 ± 0.08                                      | 1.32          | 949.1            |
| <i>Ter-lockI</i> | NA                                                                | 3.53 ± 0.4                                       | 18.9          | 196.4            |
|                  | 3.17 ± 0.44                                                       | 0.65 ± 0.06                                      | 2.05          | 1069             |
| <i>TerJ</i>      | NA                                                                | 25.4 ± 0.4                                       | NA            | 27.3             |
|                  | 3.20 ± 0.36                                                       | 1.94 ± 0.10                                      | 6.07          | 356.8            |
| <i>Ter-lockJ</i> | NA                                                                | 2.1 ± 0.18                                       | NA            | 332.1            |
|                  | 1.25 ± 0.2                                                        | 0.52 ± 0.05                                      | 4.18          | 1322             |

Shaded rows represent low-salt data while clear rows correspond to high-salt data. NA: Data not available. \*  $t_{1/2}$  value was determined by direct visual analysis. See also Figure 4 for sensorgrams.

## SUPPLEMENTAL FIGURE LEGEND

**Figure S1: Related to Figure 2. Tus-GFP Aggregation rates in presence of *Ter*, *Ter-lock* or *oriC* (non-specific control) sequences obtained with GFP-Basta.** **A.** Aggregation rates of Tus-GFP-*Ter* complexes in 150 mM KCl at 58 °C. **B.** Aggregation rates of Tus-GFP-*Ter-lock* complexes in 150 mM KCl at 58 °C. **C.** Aggregation rates of Tus-GFP-*Ter* complexes in 250 mM KCl at 52 °C. **D.** Aggregation rates of Tus-GFP-*Ter-lock* complexes in 250 mM KCl at 52 °C.

**Figure S2: Multi-alignment of Tus with Tus from diverse bacteria.** The alignment was generated with Tus from *E.coli* (1ECR\_A) as the query sequence using the Conserved Domains Database (accessed from the NCBI website).<sup>1</sup> **A.** Top listed sequences (most conserved sequences excluding *E.coli* strains). Bacteria include: *Cronobacter sakazakii* ATCC BAA-894, *Klebsiella pneumoniae* subsp. *pneumoniae* MGH 78578, *Enterobacter sp.* 638, *Shigella dysenteriae* Sd197, *Salmonella enterica* subsp. *enterica* serovar Paratyphi A str. ATCC 9150, *Sodalis glossinidius* str. 'morsitans', *Pectobacterium atrosepticum*, *Yersinia pseudotuberculosis* IP 31758, *Photobacterium luminescens* subsp. *laumondii*. **B.** Most diverse sequences included: IncT plasmid R394, *Proteus vulgaris*, *E. coli* (putative terminator protein), *Pseudoalteromonas tunicata* D2, *Photobacterium damsela* subsp. *Piscicida*, *Moritella sp.* PE36, *Marinobacter sp.* ELB17, *Salmonella enterica* subsp. *enterica* serovar Typhi, *Pseudomonas fluorescens* SBW25. The shaded box highlights residues F140-G149 in the C(6) binding pocket domain. Residues with direct contacts to the C(6) are asterisked.

## SUPPLEMENTAL EXPERIMENTAL PROCEDURES

### *Protein expression and purification*

The His<sub>6</sub>-Tus-GFP proteins (Tus-GFP) were expressed in *E. coli* BL21(DE3)RIPL in Overnight Express Instant TB Medium (Novagen) at 16°C. Cells were lysed by French press in lysis buffer (50 mM phosphate, pH 7.8, 10% glycerol v/v, 2 mM β-mercaptoethanol, 300 mM NaCl) and the lysate was cleared by centrifugation at 40,000 g for 35 min. The lysate was then incubated with Profinity IMAC Ni-charged resin (Bio-Rad) to purify Tus-GFP through its N-terminal His<sub>6</sub> tag. Proteins were eluted in lysis buffer supplemented with 200 mM imidazole and were ammonium sulphate precipitated (0.5 g/ml). The pellet was resuspended in Buffer A (50 mM Tris, pH 7.6, 250 mM KCl, 0.1 mM EDTA and 0.2 mM β-mercaptoethanol) and dialysed (SnakeSkin pleated dialysis tubing 10,000 MWCO; Pierce) twice against 200 ml of Buffer A at 4°C. The His<sub>6</sub>-Tus protein (Tus) was expressed, lysed and purified as for Tus-GFP. After ammonium sulphate precipitation, Tus was resuspended in Buffer A. The purity of proteins was assessed by SDS-PAGE (NEXT-GEL Amresco) and concentration was determined by standard Bradford assay.

### *GFP-Basta*

Oligonucleotides for GFP-basta were designed to include the 23 bp *Ter* or *Ter-lock* sequences or a 23 bp sequence from the *oriC* (non-specific DNA control) followed by a stabilizing 10-mer GC rich region in order to elevate their  $T_m$  values above 70°C (Table S2). All complementary oligonucleotide pairs (100 μM each in 10 mM Tris-HCl pH 7.6, 1 mM EDTA (TE) supplemented with 50 mM KCl) were hybridized by heating at 80°C for 2 min followed by slow cooling to room temperature.

**Table S2: Oligonucleotide sequences used for GFP-Basta**

|                    | <i>Ter</i>                                                               | <i>Ter-lock</i>                                                    |
|--------------------|--------------------------------------------------------------------------|--------------------------------------------------------------------|
| <b><i>TerA</i></b> | AATTAGTATGTTGTAACATAAAGTGGGGGCGGGG<br>TTAATCATAACAACATTGATTTACCCCCGCCCC  | TATGTTGTAACATAAAGTGGGGGCGGGG<br>TTAATCATAACAACATTGATTTACCCCCGCCCC  |
| <b><i>TerB</i></b> | AATAAGTATGTTGTAACATAAAGTGGGGGCGGGG<br>TTATTCATAACAACATTGATTTACCCCCGCCCC  | TATGTTGTAACATAAAGTGGGGGCGGGG<br>TTATTCATAACAACATTGATTTACCCCCGCCCC  |
| <b><i>TerC</i></b> | ATATAGGATGTTGTAACATAATATGGGGGCGGGG<br>TATATCCTACAACATTGATTATACCCCCGCCCC  | GATGTTGTAACATAATATGGGGGCGGGG<br>TATATCCTACAACATTGATTATACCCCCGCCCC  |
| <b><i>TerD</i></b> | CATTAGTATGTTGTAACATAAATGGGGGCGGGG<br>GTAATCATAACAACATTGATTTACCCCCGCCCC   | TATGTTGTAACATAAATGGGGGCGGGG<br>GTAATCATAACAACATTGATTTACCCCCGCCCC   |
| <b><i>TerE</i></b> | TTAAAGTATGTTGTAACATAAGCAGGGGCGGGG<br>AATTCATAACAACATTGATTCGTCCTCCCGCCCC  | TATGTTGTAACATAAGCAGGGGCGGGG<br>AATTCATAACAACATTGATTCGTCCTCCCGCCCC  |
| <b><i>TerF</i></b> | CCTTCGTATGTTGTAACGACGATGGGGGCGGGG<br>GGAAGCATAACAACATTGCTGCTACCCCCGCCCC  | TATGTTGTAACGACGATGGGGGCGGGG<br>GGAAGCATAACAACATTGCTGCTACCCCCGCCCC  |
| <b><i>TerG</i></b> | GTCAAGGATGTTGTAACATAACCAGGGGCGGGG<br>CAGTTCCTACAACATTGATTGGTCCCGCCCC     | GATGTTGTAACATAACCAGGGGCGGGG<br>CAGTTCCTACAACATTGATTGGTCCCGCCCC     |
| <b><i>TerH</i></b> | CGATCGTATGTTGTAACATACTCGGGGCGGGG<br>GCTAGCATAACAACATTGATAGAGCCCCCGCCCC   | TATGTTGTAACATACTCGGGGCGGGG<br>GCTAGCATAACAACATTGATAGAGCCCCCGCCCC   |
| <b><i>TerI</i></b> | AACATGGAAGTTGTAACATAACCAGGGGCGGGG<br>TTGTACCTTCAACATTGATTGGCCCCCGCCCC    | GAAGTTGTAACATAACCAGGGGCGGGG<br>TTGTACCTTCAACATTGATTGGCCCCCGCCCC    |
| <b><i>TerJ</i></b> | ACGCAGTAAGTTGTAACATAATGCGGGGCGGGG<br>TGCGTCATTCAACATTGATTACGCCCGCCCC     | TAAGTTGTAACATAATGCGGGGCGGGG<br>TGCGTCATTCAACATTGATTACGCCCGCCCC     |
| <b><i>oriC</i></b> | CCGGCTTTTAAGATCAACAACCTGGAAAGGATCA<br>GGCCGAAAATTCTAGTTGTTGGACCTTTCCTAGT | TTTAAGATCAACAACCTGGAAAGGATCA<br>GGCCGAAAATTCTAGTTGTTGGACCTTTCCTAGT |

## SPR

For SPR experiments, all *Ter* and *Ter-lock* were designed to include a single-stranded decamer overhang (velcro) after the base 23 to allow their hybridization to a biotinylated complementary oligonucleotide (Table S3). Individual oligonucleotides were resuspended in 10 mM Tris-HCl pH 7.6, 1 mM EDTA (TE) supplemented with 50 mM KCl to a final concentration of 100  $\mu$ M. They were combined by mixing 25  $\mu$ l of the oligonucleotide containing the 10-mer overhang with 50  $\mu$ l of the complementary oligonucleotides, and 175  $\mu$ l of Buffer A. Hybridization was achieved by heating at 80°C for 2 min followed by slow cooling to room temperature.

**Table S3: *Ter* and *Ter-lock* DNA sequences used for SPR**

|                    | <i>Ter</i>                                                     | <i>Ter-lock</i>                                          |
|--------------------|----------------------------------------------------------------|----------------------------------------------------------|
| <b><i>TerA</i></b> | AATTAGTATGTTGTAACATAAAGTGGGGGCGGGG<br>TTAATCATAACAACATTGATTTCA | TATGTTGTAACATAAAGTGGGGGCGGGG<br>TTAATCATAACAACATTGATTTCA |
| <b><i>TerB</i></b> | AATAAGTATGTTGTAACATAAAGTGGGGGCGGGG<br>TTATTCATAACAACATTGATTTCA | TATGTTGTAACATAAAGTGGGGGCGGGG<br>TTATTCATAACAACATTGATTTCA |
| <b><i>TerC</i></b> | ATATAGGATGTTGTAACATAATATGGGGGCGGGG<br>TATATCCTACAACATTGATTATA  | GATGTTGTAACATAATATGGGGGCGGGG<br>TATATCCTACAACATTGATTATA  |
| <b><i>TerD</i></b> | CATTAGTATGTTGTAACATAAATGGGGGCGGGG<br>GTAATCATAACAACATTGATTTAC  | TATGTTGTAACATAAATGGGGGCGGGG<br>GTAATCATAACAACATTGATTTAC  |
| <b><i>TerE</i></b> | TTAAAGTATGTTGTAACATAAGCAGGGGGCGGGG<br>AATTCATAACAACATTGATTCGT  | TATGTTGTAACATAAGCAGGGGGCGGGG<br>AATTCATAACAACATTGATTCGT  |
| <b><i>TerF</i></b> | CCTTCGTATGTTGTAACGACGATGGGGGCGGGG<br>GGAAGCATAACAACATTGCTGCTA  | TATGTTGTAACGACGATGGGGGCGGGG<br>GGAAGCATAACAACATTGCTGCTA  |
| <b><i>TerG</i></b> | GTCAAGGATGTTGTAACATAACCAGGGGGCGGGG<br>CAGTTCCTACAACATTGATTGGT  | GATGTTGTAACATAACCAGGGGGCGGGG<br>CAGTTCCTACAACATTGATTGGT  |
| <b><i>TerH</i></b> | CGATCGTATGTTGTAACATACTCGGGGGCGGGG<br>GCTAGCATAACAACATTGATAGAG  | TATGTTGTAACATACTCGGGGGCGGGG<br>GCTAGCATAACAACATTGATAGAG  |
| <b><i>TerI</i></b> | AACATGGAAGTTGTAACATAACCGGGGGCGGGG<br>TTGTACCTTCAACATTGATTGGC   | GAAGTTGTAACATAACCGGGGGCGGGG<br>TTGTACCTTCAACATTGATTGGC   |
| <b><i>TerJ</i></b> | ACGCAGTAAGTTGTAACATAATGCGGGGGCGGGG<br>TGCCTCATTCAACATTGATTACG  | TAAGTTGTAACATAATGCGGGGGCGGGG<br>TGCCTCATTCAACATTGATTACG  |
| <b>Velcro</b>      | Biotin-CCCCGCCCCC                                              |                                                          |
| <b>pCBio</b>       |                                                                |                                                          |

All oligonucleotides were obtained from Sigma.

1. A. Marchler-Bauer, S. Lu, J. B. Anderson, F. Chitsaz, M. K. Derbyshire, C. DeWeese-Scott, J. H. Fong, L. Y. Geer, R. C. Geer, N. R. Gonzales, M. Gwadz, D. I. Hurwitz, J. D. Jackson, Z. Ke, C. J. Lanczycki, F. Lu, G. H. Marchler, M. Mullokandov, M. V. Omelchenko, C. L. Robertson, J. S. Song, N. Thanki, R. A. Yamashita, D. Zhang, N. Zhang, C. Zheng and S. H. Bryant, *Nucleic Acids Res.*, 2011, **39**, D225-229.
