# Supplementary figures and images for: Differential Tus– Ter binding and lock formation: implications for DNA replication termination in Escherichia coli
Source: Royal Society of Chemistry journal article supplement (doi:10.1039/c2mb25281c), 2012-07-24

Figure S1

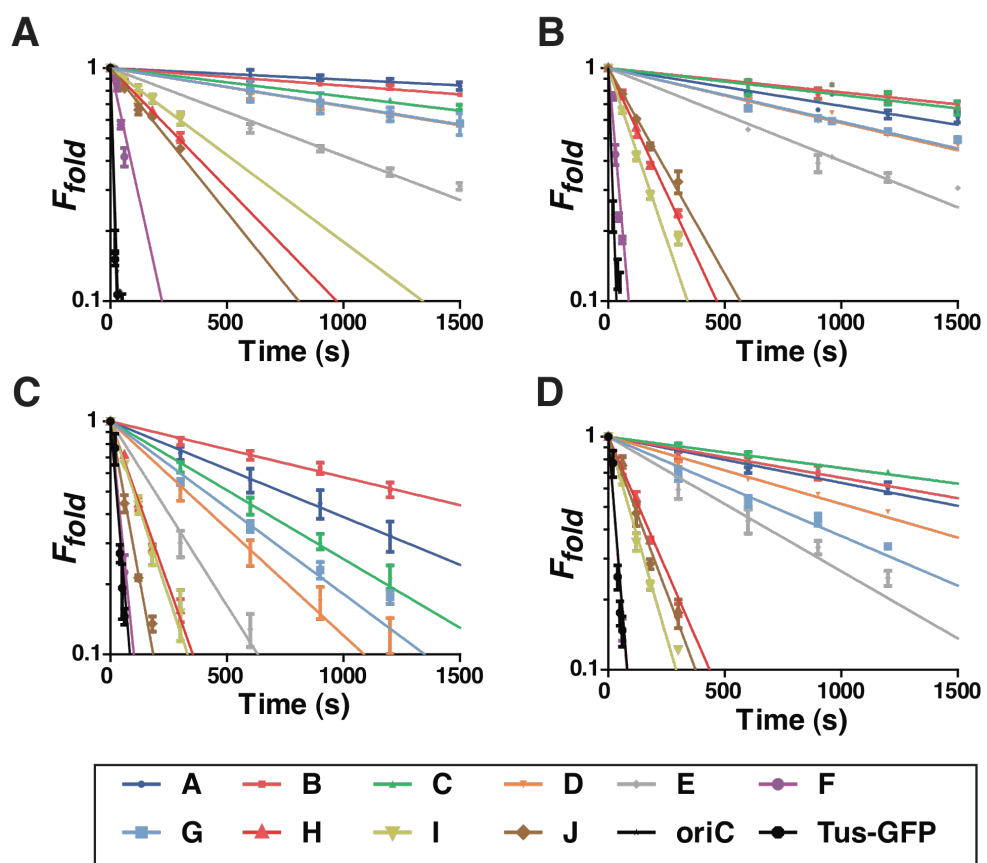

Figure S2

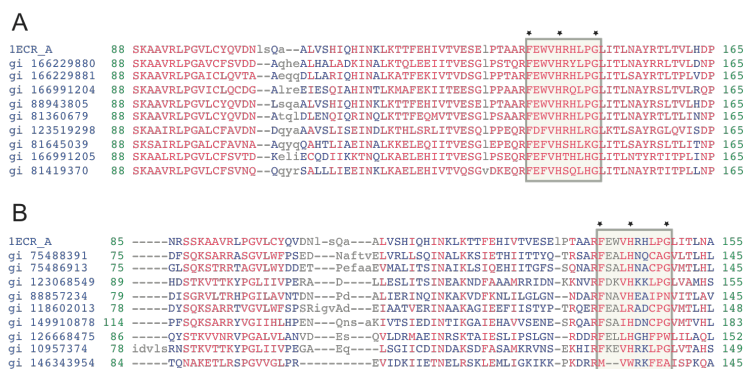

Supplement: c2mb25281c.pdf [file c2mb25281c.pdf]
